# Supplementary material for: Application of Waterborne Acrylic and Solvent-Borne Polyester Coatings on Plasma-Treated Fir (Abies alba M.) Wood
Source: MDPI journal article supplement (doi:10.3390/ma15010370), 2022-01-04
Supplement: s1 [file s1]

# Application of Waterborne Acrylic and Solvent-Borne Polyester Coatings on Plasma-Treated Fir (*Abies alba* M.) Wood

Hadi Gholamiyan <sup>1,\*</sup>, Behnam Gholampoor <sup>1</sup> and Reza Hosseinpourpia <sup>2,\*</sup>

<sup>1</sup> Department of Wood and Paper Science and Technology, Faculty of Natural Resources, University of Tehran, 77871-31587 Karaj, Iran; hadi\_gholamiyan@ut.ac.ir (H.G.); bgholampoor@ut.ac.ir (B.G.)

<sup>2</sup> Department of Forestry and Wood Technology, Linnaeus University, Lückligs Plats 1, 35195 Vaxjo, Sweden; reza.hosseinpourpia@lnu.se (R.H.)

\* Correspondence: hadi\_gholamiyan@ut.ac.ir (H.G.); reza.hosseinpourpia@lnu.se (R.H.)

## Wear Index changes

Wear index (WI) changes of untreated and treated wood samples as a function of artificial weathering was calculated as follow:

$$\alpha = \frac{WI_i - WI_j}{WI_j} \times 100$$

where  $\alpha$  is a wear index changes,  $WI_i$  is a wear index after weathering and  $WI_j$  is the wear index before weathering.

**Citation:** Gholamiyan, H.; Gholampoor, B.; Hosseinpourpia, R. Application of Waterborne Acrylic and Solvent-Borne Polyester Coatings on Plasma-Treated Fir (*Abies alba* M.) Wood. *Materials* **2022**, *15*, 370. <https://doi.org/10.3390/ma15010370>

Academic Editor: Jānis Andersons

Received: 13 December 2021

Accepted: 27 December 2021

Published: 4 January 2022

**Publisher's Note:** MDPI stays neutral with regard to jurisdictional claims in published maps and institutional affiliations.

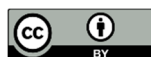

**Copyright:** © 2022 by the authors. Licensee MDPI, Basel, Switzerland. This article is an open access article distributed under the terms and conditions of the Creative Commons Attribution (CC BY) license (<https://creativecommons.org/licenses/by/4.0/>).

**Table S1.** WI changes of the untreated and treated samples by artificial weathering.

| Treatment | $\alpha$ (%) |
|-----------|--------------|
| C         | 152,2        |
| A         | 214,3        |
| P         | 166,7        |
| AP        | 130,8        |
| NP        | 121,4        |
| CP        | 141,7        |
| AP-A      | 200,0        |
| NP-A      | 160,0        |
| CP-A      | 133,3        |
| AP-P      | 112,5        |
| NP-P      | 112,5        |
| CP-P      | 142,9        |
